# Supplementary material
Source: PubMed Central journal article supplement (PMC5747356)
Supplement: NIHMS925744-supplement-supplemental.pdf [file NIHMS925744-supplement-supplemental.pdf]

Table S1. Oligonucleotides used in study. 5'-3' orientation

| Name            | Use             | Sequence                             | Tm (C)       |
|-----------------|-----------------|--------------------------------------|--------------|
| SUNV 243+       | RT-PCR          | CAGGCGGATGCAAAAGACGAC                | 59           |
| SUNV 772+       | sequencing      | CATGCGATGGGGTCTTTCTTATTG             | 53.5         |
| SUNV 1452+      | sequencing      | CCGAGAGGGGAGGTATCAAG                 | 52.7         |
| SUNV 3049+      | RT-PCR          | TGGCGTGCAAACAATCAATA                 | 52.5         |
| SUNV 3712+      | sequencing      | CAAGTTTGCCCATTTGATACTCTC             | 52.1         |
| SUNV 4190+      | sequencing      | GAGGAACGCGATGTGAGGTCTGTC             | 60.8         |
| SUNV 6062+      | sequencing      | GATCGCAATGGACTAGAAGAGAAATGG          | 59.5         |
| SUNV 8110+      | sequencing      | CAGCCCATGGGAGAAAGAATCA               | 65           |
| SUNV 8552+      | RT-PCR          | GTT CACCCCCTTCCCTTTACTCC             | 57.1         |
| SUNV 8731+      | sequencing      | TGGCGAGCTTATCATTAGAGGTTCA            | 65           |
| SUNV 9000+      | RT-PCR          | GATGCCCATCAGAAAAGACAAAG              | 57.8         |
| SUNV 9677+      | sequencing      | GTAATGGGCCCCAGTTGCTATTT              | 65           |
| SUNV 10273+     | sequencing      | GGTGTCCCCCGAGAAGTACTGATTC            | 58.3         |
| SUNV 10660+     | sequencing      | GTAAAGGGAAGGGGGTGAACATC              | 60           |
| SUNV 10938+     | RACE/sequencing | CATCACAGGCCACGAAACAACCA              | 65           |
| SUNV 463-       | RACE/sequencing | GTCAAGGCAAGCCATTATTTTACAA            | 55.7         |
| SUNV 1591-      | sequencing      | GCAGCGTCCCACCCTCGTT                  | 59.5         |
| SUNV 2680-      | sequencing      | ACCCGGCACCCATCCATTTAGA               | 61           |
| SUNV 3428-      | RT-PCR          | TTCGCGGATAATGGTGAC                   | 50           |
| SUNV 4425-      | sequencing      | CACCGCATAATGACAGAAGCAGAC             | 57.6         |
| SUNV 4969-      | sequencing      | ACTGGCCCCAATGTTTTATGT                | 52.6         |
| SUNV 5665-      | sequencing      | TCTTTTTGGGCATTGTCACCTTGT             | 56.6         |
| SUNV 6398-      | RT-PCR          | CCCATCACGCGGAATAAAGG                 | 56.7         |
| SUNV 8051-      | sequencing      | CATGGGCTGATTATGGATGTGC               | 56.6         |
| SUNV 9037-      | RT-PCR          | GGGGGAATTCTATGAGGGTGTG               | 65           |
| SUNV 1050 FWD   | qRT-PCR         | TTCGGGGACTATCAACATCAT                | 55           |
| SUNV 1075 probe | qRT-PCR         | FAM-AACGCAGGATTGTTGGCATTTCATAAT-BHQ1 | 65           |
| SUNV 1200 REV   | qRT-PCR         | CACTACCCCCATTGTCAGAGTC               | 55           |
| alpha 6999c1*   | Rev Mix         | AACATTCCGGATTTTCATCAT                | use at<br>50 |
| alpha 6999c2    |                 | AACATTCCGGACTTTCATCAT                |              |
| alpha 6999c3    |                 | AACATGCCTGATTTTCATCAT                |              |
| alpha6533f1     | Fwd Mix         | TTGCAGGAGATACCAATGGA                 | use at<br>50 |
| alpha6533f2     |                 | CTGCAGGACATACCCATGGA                 |              |
| alpha6533f3     |                 | CTACAAGAAGTGCCTATGGA                 |              |
| alpha6533f4     |                 | CTACAGGAAGTGCCGATGGA                 |              |
| alpha6533f5     |                 | CTGCAAGATATACCCATGGA                 |              |
| alpha6533f6     |                 | CTTCAGGACATCCCGATGGA                 |              |
| alpha6533f7     |                 | CTGCAAGAGGTACCCATGGA                 |              |

\*alpha mix primers designed by R. Lanciotti

Table S2. Conditions for cell maintenance

| Type                     | Temp (C) | Media components <sup>1</sup>                                                                                                                                                           | Company                  |
|--------------------------|----------|-----------------------------------------------------------------------------------------------------------------------------------------------------------------------------------------|--------------------------|
| BHK, Vero, DF-1          | 37       | 1X DMEM <sup>2</sup> , FBS <sup>3</sup> (10%), pen-strep (1%)                                                                                                                           | Gibco/Invitrogen         |
| HAE (CTVM)               | 32       | 1X DMEM/F12 (58 mL), L15 (29mL), tryptose phosphate broth (10 mL), FBS (2%), pen-strep (1%)                                                                                             | Invitrogen, Sigma, Atlas |
| Sua 4                    | 28       | Schneider's (97 mL), FBS (2%), pen-strep (1%)                                                                                                                                           | Invitrogen, Atlas        |
| AP-61                    | 28       | L15 (82 mL), tryptose-phosphate broth (15 mL), FBS (2%), pen-strep (1%)                                                                                                                 | Invitrogen, Sigma, Atlas |
| C6/36, <i>Cx. quinqs</i> | 28       | 2X DMEM (50 mL), FBS (2%), sodium bicarbonate (7.5%), 1M HEPES (2 mL), 100X non-essential amino acids (1 mL), sterile di water (40 mL), 100 mM sodium pyruvate (1 mL), pen-strep (1 mL) | Gibco, Atlas             |

<sup>1</sup>Based on 100 mL

<sup>2</sup>Dulbecco's Minimal Essential Media

<sup>3</sup>Fetal bovine serum

Figure 2 Supplement: Abbreviations and accession numbers for viruses used in the phylogenetic trees

ARV, Adelaide River virus (N: Q65111; L: AAG10421); ALMV, Almpiwar virus (L: AAZ43273); ARAV, Aravan virus (N: Q6X1D8; L: ABV03822); ABLV Australian bat lyssavirus (N: AAD01267; L: NP\_487343); BASV, Bas-Congo virus (N: AFS65337; L: AGS65335); BYSMV, Barley yellow striate mosaic virus (L: ACT21686); BBOV, Bimbo virus (L: ADK66253); BTKV, Boteke virus (L: ADK66251); BEFV, Bovine ephemeral fever virus (N: NP\_065398; L: NP\_065409); CHPV, Chandipura virus (N: P11211; L: P13179); COCV, Cocal virus (N: ACB47434; L: ACB47438); DAffSV, *Drosophila affinis* sigmavirus (GQ410980); DObsSV, *Drosophila obscura* sigma virus (GQ410979); DURV, Durham virus (FJ952155); DUVV, Duvenhage virus (N: Q66453; L: ABZ81216); EBLV-1, European bat lyssavirus (N: AAX62875; L: ABZ81181); FLAV, Flanders virus (N: AAN73283; L: AAN73288); FUKV, Fukuoka virus (L: AAZ43279); GARV, Garba virus (L: ADK66255); HIRRV, Hirame rhabdovirus (N: ACO87995; L: NP\_919035); IRKV, Irkut virus (N: Q5VKP6; L: ABV03823); ISFV, Isfahan virus (N: Q5K2K7; L: Q5K2K3); KCV, Kern Canyon virus (N: ABE69215; L: HQ207197); KHUV, Khujand virus (N: Q6X1D4; L: ABV03824); KOLV, Kolongo virus (N: ABE69214); KOTV, Kotonkon virus (N: ABE69213; L: AAZ43267); LDV, Le Dantec virus (L: AAZ43278); MOKV, Mokola virus (N: YP\_142350; L: ABZ81211); MOUV, Moussa virus (N: ACZ81403; L: ACZ81402); NASV, Nasoule virus (L: GU816017); NGAV, Ngaingan virus (L: AAZ43277); OVRV, Oak-Vale virus (N: AEJ07651; L: AEJ07657.1); OBOV, Obodhiang virus (N: ABE69212); OITAV, Oita rhabdovirus (N: BAD13431); OUAV, Ouango virus (L: ADK66252); PRV, Perch rhabdovirus (N: NC\_020803; L: NC\_020803); PERV, Perinet virus (L: AAZ43280); PFRV, Pike fry rhabdovirus (N: FJ872827; L: FJ872827); RABV, Rabies virus (N: ACN51666; L: Q66T60); SJAV, Sandjimba virus (N: ABE69216); STRV, Sea Trout rhabdovirus (N: AF434992); SIGMAV, Sigma virus (N: ACV67011; L: ACU65438); SVSV, Spring viremia of carp virus (N: U18101; L: U18101); SUNV, Sunguru virus (KF395226); TIBV, Tibrogargan virus (L: AAZ43274); TUPV, Tupaia rhabdovirus (N: YP\_238528; L: YP\_238534); VSINV, Vesicular stomatitis Indiana virus (N: P11212; L: NP\_041716); VSNNJ, Vesicular stomatitis New Jersey virus (N: P04881; L: P16379); WONV, Wongabel virus (N: YP\_002333271; L: AAZ43276).
